# Supplementary material for: Venoarterial extracorporeal membrane oxygenation for refractory cardiogenic shock post-cardiac arrest
Source: Springer Nature journal article supplement (doi:10.1007/s00134-016-4541-y), 2016-09-28
Supplement: MOESM1 [file 10791352]

**Venoarterial-Extracorporeal Membrane Oxygenation for Refractory Cardiogenic Shock Post-Cardiac Arrest**

M Pineton de Chambrun, N Bréchot, G Lebreton, M Schmidt, G Hekimian, P Demondion, JL Trouillet, P Leprince, J Chastre, A Combes, CE Luyt

**Online data supplement**

**Methods**

**Patient management**

Clinical features of poor outcome included absence of pupillary light reflex or corneal reflex after 72 h, absence of motor reaction to pain or extension posturing after 72 h. Electroencephalography features of poor outcome included diffuse suppression or low voltage at 24 h, burst suppression at 24 h, absence of reactivity after return to normothermia. The decision to withdraw care was made based on clinical examination and EEG findings. Patients with reactivity to stimuli on EEG were deemed to have potentially favorable outcomes and their care was pursued. In ambiguous cases, care was continued, and prognostic examination and EEG were repeated several days later. Somatosensory evoked potentials were not used because this technique is not available at the bedside in our unit.

**Data collection**

The following information was recorded: age; sex; severity of underlying condition(s), according to the McCabe and Jackson, and Charlson criteria [E1]; body mass index; Utstein style variables related to cardiac arrest (CA): CA cause; where CA occurred; first rhythm monitored, duration of resuscitation (no-flow and low-flow), witnessed CA and bystander-attempted cardiopulmonary resuscitation (CPR). The following variables were recorded during the first 24 h following ECMO implantation: Simplified Acute Physiology Score (SAPS) II [E2], Sequential Organ Failure Assessment (SOFA) score [E3] and out-of-hospital CA (OHCA) score [E4]; time between CA and VA-ECMO implantation; pre-ECMO left ventricular ejection fraction (LVEF) and aortic velocity-time integral (VTI); temperature; heart rate; respiratory rate; day-1 (day of ECLO implantation) urine output; and blood laboratory findings (leukocyte and platelet counts, hematocrit, pH, bicarbonates, arterial lactate peak, serum sodium, potassium, creatinine, urea, bilirubin, international normalized ratio (INR), alanine aminotransferase (ALT) peak). The Survival After Veno-arterial Extracorporeal membrane oxygenation (SAVE) score was also retrospectively calculated for all patients [E5], and the ENCOURAGE (prEdictioN of Cardiogenic shock OUtcome foR AMI patients salvaGed by VA-ECMO) score was calculated retrospectively for the 67 patients with OHCA of ischemic origin [E6].

**Results**

**Outcome**

The ability to differentiate between survivors and non-survivors, based on SAVE score, was assessed with receiver operating-characteristics (ROC)–curve analysis (Fig. E3). The area under the ROC curve was 0.66 (95% CI 0.55–0.75). To predict hospital death, a SAVE score cut-off value of –11 had 77% (95% CI, 63–88) sensitivity and 63% (95% CI 38–84) specificity.

**Subgroup analyses of patients with OHCA due to acute coronary syndrome**

For 67 (71%) of our patients, CA was due to acute coronary syndrome and occurred out-of-hospital, in the emergency department or in the catheterization lab. Their characteristics are described in Table E5. When the analysis was restricted to these patients, similar results were obtained: 21 (31%) survived, and shockable rhythm (OR 0.9; 95% CI 0.01–0.8), INR >2.4 (OR 5.7; 95% CI 1.3–25.9) and admission SOFA score >14 (OR 6.2; 95% CI 1.5–25) were independently associated with hospital mortality. SAVE and ENCOURAGE scores were not independently associated with outcomes. The ability to differentiate between survivors and non-survivors, based on the ENCOURAGE score, was assessed with ROC-curve analysis (Figure E4). To predict hospital death, an ENCOURAGE score cut-off value of 25 had 77% (95% CI 63–88) sensitivity and 63% (95% CI 38–84) specificity.**Table E1. ICU** Admission clinical and biological characteristics of VA-ECMO–treated patients

| Characteristic | Entire Cohort (*n*=94) | Survivors  (*n*=26) | Non-Survivors (*n*=68) | *P* |
| --- | --- | --- | --- | --- |
| Day-1 clinical (worst value) |  |  |  |  |
| Temperature (°C) | 31.9 [30.6–33.6] | 32.1 [31.2–35.4] | 31.8 [30.5–33.2] | 0.06 |
| Heart rate (bpm) | 71 [54–116] | 104 [57–121] | 68 [53–110] | 0.1 |
| Urine output (mL) | 525 [87–1625] | 1400 [918–2250] | 250 [0–1500] | <0.0001 |
| Day-1 biological parameter (worst value) | |  |  |  |
| Leukocyte count (G/L) | 18±8 | 20.2±8.6 | 17±8.1 | 0.09 |
| Hematocrit (%) | 29 [24–34] | 31.5 [25.7–37] | 26 [23–32] | 0.03 |
| Platelet count (G/L) | 173±90 | 213±91 | 159±85 | 0.007 |
| pH | 7.11±0.16 | 7.17±0.16 | 7.08±0.16 | 0.02 |
| Serum creatinine (µmol/L) | 141 [113–198] | 122 [93.7–159] | 150 [117–198] | 0.08 |
| Serum bilirubin (µmol/L) | 12 [8–16] | 11 [7–13.2] | 13 [8–17.7] | 0.1 |
| Arterial lactate peak (mmol/L) | 11.5 [9–17] | 9.6 [7.8–11.4] | 12.6 [9.5–20] | <0.0001 |
| INR | 2.4 [1.6–4.8] | 1.9 [1.8–2.4] | 2.9 [1.9–5.5] | 0.003 |
| ALT peaka (IU/L) | 279 [135–1230] | 175 [80–490] | 384 [166–1630] | 0.03 |

Abbreviations: *INR* international normalized ratio, *ALT* alanine aminotransferase.

a ALT was not available for 1 non-survivor.**Table E2.** Outcome measures for all 94 VA-ECMO–treated patients according to the use of intraaortic balloon pump

| Outcome measure | IABP  (n = 47) | No IABP  (n = 47) | P |
| --- | --- | --- | --- |
| VA-ECMO duration (days) | 5 [3-8] | 3 [1-5] | 0.1 |
| ICU length of stay (days) | 6 [2-14] | 3 [1-10] | 0.7 |
| MV duration (days) | 5 [3-14] | 3 [2-9] | 0.2 |
| ECMO complications  Limb ischemia  Fasciotomy  Amputation  Bleeding  Infection | 6 (12.8)  0 (0)  0 (0)  12 (26)  10 (21) | 8 (17)  4 (9)  1 (2)  12 (26)  7 (15) | 0.5  0.04  0.3  1  0.4 |
| VA-ECMO weaning |  |  |  |
| Yes | 16 (34) | 17 (36) | 0.8 |
| No | 31 (66) | 30 (64) | 0.7 |
| Died on ECMO | 28 (60) | 30 (64) | 0.8 |
| LVAD | 4 (9) | 1 (2) | 0.1 |
| Heart transplantation | 2 (4) | 0 (0) | 0.5 |
| 28-day survival | 17 (36) | 13 (28) | 0.3 |
| 6-month survival | 16 (34) | 10 (21) | 0.16 |
| 12-month survival | 16 (34) | 9 (19) | 0.1 |

Abbreviations: *VA-ECMO* venoarterial-extracorporeal membrane oxygenation, *ICU* intensive care unit, *MV* mechanical ventilation, *IABP* intra-aortic balloon pump, *LVAD* left ventricular assist device

Continuous variables are expressed as median [IQR] and categorical variables as *n* (%).**Table E3.** Main characteristics of all VA-ECMO–treated patients at ICU admission and comparisons between 1-year survivors and non-survivors

| Characteristic | Entire Cohort  (*n* = 94) | Survivors  (*n* = 25) | Non-Survivors (*n* = 69) | *P* |
| --- | --- | --- | --- | --- |
| Age (y) | 50.8±11.5 | 49.8±10.2 | 51.1±12 | 0.6 |
| Male sex | 71 (76) | 19 (76) | 52 (75.4) | 0.9 |
| Body mass index (kg/m2) | 26.2 [23.4–29.3] | 26.2 [23.6–28.5] | 26.1 [23.4–29.4] | 0.9 |
| McCabe & Jackson score for comorbidity | 1 [0–2] | 0 [0–1.5] | 1 [0–2] | 0.4 |
| SAPS II | 82 [77–88] | 77 [70.5–83] | 84 [78.5–88.5] | 0.004 |
| SOFA score | 15 [13–17] | 13 [12–14.5] | 16 [14–18] | <0.0001 |
| Organ failurea |  |  |  |  |
| Cardiovascular system | 94 (100) | 25 (100) | 69 (100) | – |
| Lung | 94 (100) | 25 (100) | 69 (100) | – |
| Brain | 91 (97) | 23 (92) | 68 (98.6) | 0.1 |
| Kidney | 48 (51) | 5 (20) | 43 (62.3) | <0.0001 |
| Hematological | 6 (6) | 1 (4) | 5 (7.2) | 0.6 |
| Liver | 2 (2) | 0 (0) | 2 (2.9) | 0.4 |
| OHCA score | 41.3 [30.8–50.9] | 32.9 [24.3–43.3] | 43.7 [33.2–51.8] | 0.002 |
| Etiology of cardiac arrest |  |  |  |  |
| Myocardial infarction | 66 (70) | 18 (72) | 48 (69.6) | 0.8 |
| AD of chronic cardiomyopathy | 8 (9) | 3 (12) | 5 (7.2) | 0.5 |
| Pulmonary embolism | 4 (4) | 2 (8) | 2 (2.9) | 0.3 |
| Drug intoxication | 3 (3) | 0 (0) | 3 (4.3) | 0.3 |
| Anaphylactic shock | 3 (3) | 2 (8) | 1 (1.4) | 0.1 |
| Miscellaneousb | 10 (11) | 0 (0) | 10 (14.5) | 0.04 |
| Witnessed CA | 88 (94) | 24 (96) | 64 (92.8) | 0.6 |
| Attempted defibrillation | 56 (60) | 20 (80) | 36 (52.2) | 0.01 |
| Bystander-attempted CPR | 76 (81) | 20 (80) | 56 (81.2) | 0.9 |
| No Flow (min) | 0 [0–5] | 0 [0–3] | 0 [0–5] | 0.8 |
| Low Flow (min) | 30 [15–42.7] | 30 [10–40] | 30 [16–45] | 0.4 |
| Out-of-hospital CA | 78 (83) | 21 (84) | 57 (83) | 0.8 |
| Shockable rhythm | 56 (60) | 20 (80) | 36 (52.2) | 0.01 |
| CA-to-VA-ECMO interval (h) | 7.4 [3.3–14] | 10.3 [4.1–17.7] | 6.5 [3–13.4] | 0.1 |
| Therapeutic hypothermia | 75 (80) | 19 (76) | 56 (81.2) | 0.6 |
| Echocardiographic findings before ECMO implantation | |  |  |  |
| LVEFc (%) | 15 [10–20] | 15 [10–20] | 15 [10–20] | 0.4 |
| Aortic VTId (cm) | 7 [5–9] | 8 [5.8–10.5] | 6 [5–8] | 0.04 |
| Day-1 clinical (worst value) |  |  |  |  |
| Temperature (°C) | 31.9 [30.6–33.6] | 32.1 [31.1–34.9] | 31.8 [30.5–33.3] | 0.1 |
| Heart rate (bpm) | 71 [54–116] | 105 [57–121] | 68 [53–110] | 0.2 |
| Urine output (mL) | 525 [87–1625] | 1300 [862–2000] | 250 [0–1510] | 0.001 |
| Day-1 biological (worst value) | |  |  |  |
| pH | 7.11±0.16 | 7.17±0.16 | 7.09±0.16 | 0.05 |
| Serum creatinine (µmol/L) | 141 [113–198] | 123 [99–164] | 149 [117–198] | 0.1 |
| Serum bilirubin (µmol/L) | 12 [8–16] | 11 [7–12.5] | 13 [18–17.5] | 0.08 |
| Arterial lactate peak (mmol/L) | 11.5 [9–17] | 9.7 [8.1–11.4] | 12.6 [9.4–20] | 0.001 |
| INR | 2.4 [1.6–4.8] | 2 [1.5–2.4] | 2.8 [1.8–5.5] | 0.005 |
| ALT peake (IU/L) | 279 [135–1230] | 174 [79.5–425.5] | 390 [167–1608] | 0.02 |
| Abbreviations; VA-ECMO, venoarterial extracorporeal membrane oxygenation; ICU, intensive care unit; *SAPS* simplified acute physiology score, *SOFA* sequential organ failure assessment, *AD* acute decompensation, *CA* cardiac arrest, *CPR* cardiopulmonary resuscitation, *LVEF* left ventricular ejection fraction, *VTI* velocity-time integral, *day 1* day of ECMO implantation, *INR* international normalized ratio, *ALT* alanine aminotransferase  Continuous variables are expressed as mean ± SD or median [IQR] and compared using Student’s *t*-test or Wilcoxon’s rank test. Categorical variables are expressed as *n* (%) and were compared with *χ*2 tests.  a Deemed present when the corresponding SOFA score was >2.  b Miscellaneous causes of CA: hypoxic CA and/or potassium disorders: 2 each; and 1 each: near drowning, myocarditis, subarachnoid hemorrhage, amniotic fluid embolism, postpartum hemorrhage, idiopathic cardiac arrhythmia.  c Available for 87 patients (24 survivors and 63 non-survivors); for the others, the information was not entered in the chart.  d Available for 67 patients (22 survivors and 45 non-survivors); for the others, the information was not entered in the chart.  e ALT was not available for 1 non-survivor. | | | | |

**Table E4.** Univariable and multivariable analyses of factors associated with 1-year mortality

| Factor | Univariable analysis  OR [95% CI] | *P* | Multivariable analysis  OR [95% CI] | *P* |
| --- | --- | --- | --- | --- |
| Arterial lactate >11.5 mmol/L | 5.8 [2–17.4] | 0.002 |  |  |
| INR >2.4 | 7.7 [2.4–24.8] | 0.001 | 4.8 [1.4–16.5] | 0.01 |
| Renal failure at ICU admissiona | 6.6 [2.2–19.7] | 0.001 |  |  |
| Pre-VA-ECMO SOFA score >14 | 6.7 [2.3–19.3] | <0.0001 | 4.2 [1.4–12.9] | 0.01 |
| SAPS II >82 | 3.1 [1.1–8.5] | 0.02 |  |  |
| Shockable rhythm | 0.27 [0.09–0.8] | 0.02 |  |  |
| Abbreviations: *OR* odds ratio, *CI* confidence interval, *INR* international normalized ratio, *ICU* intensive care unit, *VA-ECMO* venoarterial-extracorporeal membrane oxygenation, *SOFA* Sequential Organ Failure Assessment, *SAPS* Simplified Acute Physiology Score  a Defined as a renal SOFA score of 3 or 4. | | | | | |

**Table E5.** Main characteristics of patients with OHCA of ischemic origin under VA-ECMO at ICU admission and comparisons between hospital survivors and non-survivors

| Characteristic | Entire cohort  (*n* = 67) | Survivors  (*n* = 19) | Non-survivors  (*n* = 48) | *P* |
| --- | --- | --- | --- | --- |
| Age (y) | 53.1±9.7 | 50.1±9 | 54.1±9.8 | 0.1 |
| Male sex | 58 (86) | 16 (84.2) | 42 (87.5) | 0.9 |
| Body mass index (kg/m2) | 26.1 [23.9–28.4] | 26.2 [23.8–27.7] | 26.1 [23.6–29.1] | 0.7 |
| McCabe & Jackson comorbidity score | 0.5 [0–2] | 0 [0–2] | 1 [0–2] | 0.9 |
| SAPS II | 81 [77–86] | 77 [68–82] | 83 [79–88] | 0.005 |
| SOFA score | 15 [13–16] | 13 [12–14] | 15 [14–17] | <0.0001 |
| Organ failurea |  |  |  |  |
| Cardiovascular system | 67 (100) | 19 (100) | 48 (100) | – |
| Lung | 67 (100) | 19 (100) | 48 (100) | – |
| Brain | 65 (97) | 18 (95) | 47 (98) | 0.4 |
| Kidney | 33 (49) | 4 (21) | 29 (60) | 0.004 |
| Hematological | 2 (3) | 0 | 2 (4) | 0.3 |
| Liver | 0 | 0 | 0 | – |
| OHCA score | 40.2 [30.5–50.3] | 31.9 [25.2–37.2] | 42.9 [33–51.8] | 0.001 |
| No Flow (min) | 0 [0–5] | 1 [0–5] | 0 [0–5] | 0.6 |
| Low Flow (min) | 30 [20–45] | 25 [13–45] | 30 [20–45] | 0.2 |
| Witnessed CA | 63 (94) | 18 (95) | 45 (94) | 0.8 |
| Attempted defibrillation | 47 (70) | 18 (95) | 29 (60) | 0.006 |
| Bystander-attempted CPR | 51 (76) | 14 (74) | 37 (77) | 0.7 |
| Shockable rhythm | 47 (70) | 18 (95) | 29 (60) | 0.006 |
| Out-of-hospital CA | 67 (100) | 19 (100) | 48 (100) | – |
| CA-to-VA-ECMO interval (h) | 9.1 [3.7–15.1] | 11.1 [4.1–20.7] | 8.2 [3.3–14.2] | 0.1 |
| Therapeutic hypothermia | 54 (81) | 13 (68) | 41 (85) | 0.1 |
| Echocardiographic findings at ECMO implantation | |  |  |  |
| LVEFb (%) | 15 [10–20] | 15 [10–21.25] | 15 [10–20] | 0.3 |
| Aortic VTIc (cm) | 7 [5–8] | 8 [5.6–11.5] | 6 [5–8] | 0.09 |
| Day-1 clinical data (worst value) | |  |  |  |
| Temperature (°C) | 32 [30.6–33.9] | 33.7 [31–35.9] | 31.8 [30.5–33.2] | 0.06 |
| Heart rate (bpm) | 70 [54–117] | 103 [58–121] | 65 [53–110] | 0.27 |
| Day-1 urine output (mL) | 750 [100–1550] | 1500 [1000–2000] | 350 [12.5–1475] | 0.001 |
| SAVE score risk class [E5]  I  II  III  IV  V | –  –  4 (6)  18 (27)  45 (67) | –  –  1 (5)  10 (53)  8 (42) | –  –  3 (6)  8 (17)  37 (77) | 0.01 |
| ENCOURAGE score class [E6]  ENCOURAGE 0–12  ENCOURAGE 13–18  ENCOURAGE 19–22  ENCOURAGE 23–27  ENCOURAGE ≥28 | –  4 (6)  9 (13)  17 (25)  37 (55) | –  3 (16)  2 (11)  8 (42)  6 (31) | –  1 (2)  7 (15)  9 (19)  31 (65) | 0.02 |
| Day-1 biological data (worst value) | |  |  |  |
| pH | 7.1±0.16 | 7.2±0.13 | 7.06±0.15 | 0.001 |
| Serum creatinine (µmol/L) | 144 [113–195] | 118 [90–174] | 153 [117–196] | 0.1 |
| Serum bilirubin (µmol/L) | 12 [8–16] | 9 [5–13] | 13 [8.25–16.75] | 0.021 |
| Arterial lactate peak (mmol/L) | 10.9 [8.5–14.1] | 9.2 [7.9–11] | 11.75 [9.1–16.6] | 0.002 |
| INR | 2.2 [1.6–3.7] | 1.6 [1.4–2.3] | 2.7 [1.9–4.7] | 0.005 |
| ALT peakd (IU/L) | 256 [157–969] | 177 [78–460] | 383 [171–1258] | 0.04 |

Abbreviations: *VA-ECMO* venoarterial-extracorporeal membrane oxygenation, *ICU* intensive care unit, S*APS* Simplified Acute Physiology Score, *SOFA* Sequential Organ Failure Assessment, *OHCA* out-of-hospital cardiac arrest, *CA* cardiac arrest, C*PR* cardiopulmonary resuscitation, *LVEF* left ventricle ejection fraction, *VTI* velocity-time integral, *day 1* day of ECMO implantation, *SAVE* Survival After Venoarterial Extracorporeal membrane oxygenation, *ENCOURAGE* prEdictioN of Cardiogenic shock OUtcome foR AMI patients salvaGed by VA-ECMO, *INR* international normalized ratio, *ALT* alanine aminotransferase

Continuous variables are expressed as mean±SD or median [IQR] and compared using Student’s *t*-test or Wilcoxon’s rank test. Categorical variables are expressed as *n* (%) and were compared with *χ*2 tests.

a Deemed present when the corresponding SOFA score was >2.

b Available for 63 patients (20 survivors and 43 non-survivors).

c Available for 47 patients (18 survivors and 29 non-survivors).

d Not available for 1 survivor.

**Fig. E1** Kaplan–Meier probability of survival curve for all patients included in the study

**Fig. E2.** Kaplan–Meier probability of survival curves according to pre-venoarterial–extracorporeal membrane oxygenation Sequential Organ Failure Assessment (SOFA) score >14 or ≤14

**Fig. E3** ROC-curve analysis of SAVE scores to predict hospital mortality for the 94 patients included in the study. Area under the ROC curve was 0.66 (95% CI 0.55–0.75).

**Fig. E4** ROC-curve analysis of ENCOURAGE scores to predict hospital mortality for the 67 patients with OHCA of ischemic origin. Area under the ROC curve was 0.70 (95% CI 0.58–0.81).

**References**

E1. Charlson ME, Pompei P, Ales KL, MacKenzie CR (1987) A new method of classifying prognostic comorbidity in longitudinal studies: development and validation. J Chronic Dis 40:373–383.

E2. Le Gall JR, Lemeshow S, Saulnier F (1993) A new Simplified Acute Physiology Score (SAPS II) based on a European/North American multicenter study. JAMA 270:2957–2963.

E3. Vincent JL, Moreno R, Takala J et al (1996) The SOFA (Sepsis-related Organ Failure Assessment) score to describe organ dysfunction/failure. On behalf of the Working Group on Sepsis-Related Problems of the European Society of Intensive Care Medicine. Intensive Care Med 22:707–710.

E4. Adrie C, Cariou A, Mourvillier B et al (2006) Predicting survival with good neurological recovery at hospital admission after successful resuscitation of out-of-hospital cardiac arrest: the OHCA score. Eur Heart J 27:2840–2845. doi: 10.1093/eurheartj/ehl335

E5. Schmidt M, Burrell A, Roberts L et al (2015) Predicting survival after ECMO for refractory cardiogenic shock: the Survival After Veno-arterial-ECMO (SAVE)-score. Eur Heart J 36:2246–2256. doi: 10.1093/eurheartj/ehv194

E6. Muller G, Flecher E, Lebreton G et al (2016) The ENCOURAGE mortality risk score and analysis of long-term outcomes after VA-ECMO for acute myocardial infarction with cardiogenic shock. Intensive Care Med 42:370–378. doi: 10.1007/s00134-016-4223–9
